# Supplementary material for: Fat‐Specific Protein 27 Regulation of Vascular Function in Human Obesity
Source: PubMed Central journal article supplement — J Am Heart Assoc. 2019 Jun 1;8(11):e011431. doi: 10.1161/JAHA.118.011431 (PMC6585348; doi:10.1161/jaha.118.011431), 2019-06-01

## **Supplemental Material**

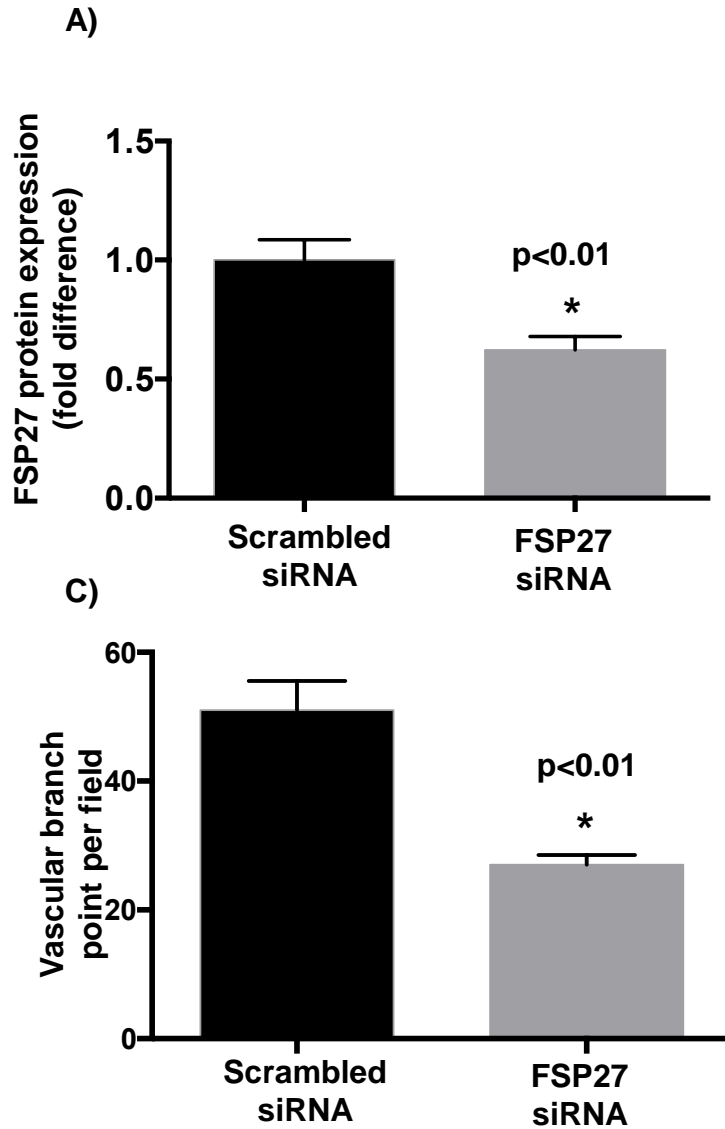

**Figure S1. Inhibition of FSP27 in cultured human arterial endothelial cells (HAEC) and measurement of vascular function.**

**A)** Quantification of siRNA mediated knockdown of FSP27 in cultured human arterial endothelial cells (HAEC). **B)** siRNA mediated inhibition of FSP27 in HAEC impairs insulin-mediated nitric oxide (NO) production. **C)** Quantification of in-vitro angiogenic capacity of HAEC after siRNA mediated knockdown of FSP27. Experiments were repeated three times.

**Figure S2. Co-localization of VEGF-A and FSP27 in primary endothelial cells isolated from human fat.**

**A)** Merged image of FSP27 and VEGF-A **B)** Image of VEGF-A alone **C)** Image of FSP27 alone . Green = VEGF-A, red = FSP27, blue =Dapi, a nuclear stain.

**A)**

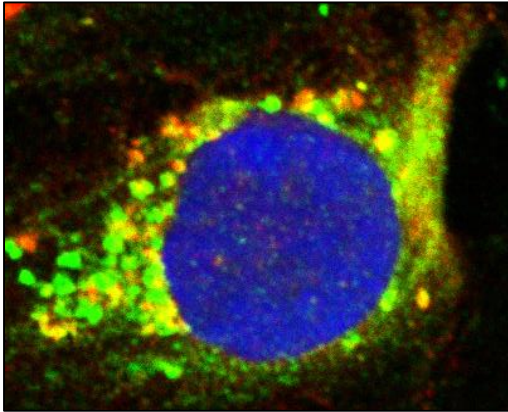

**B)**

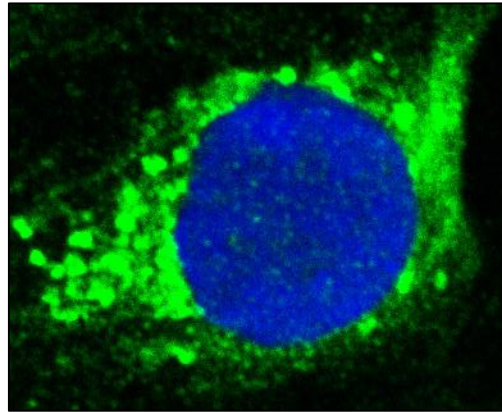

**C)**

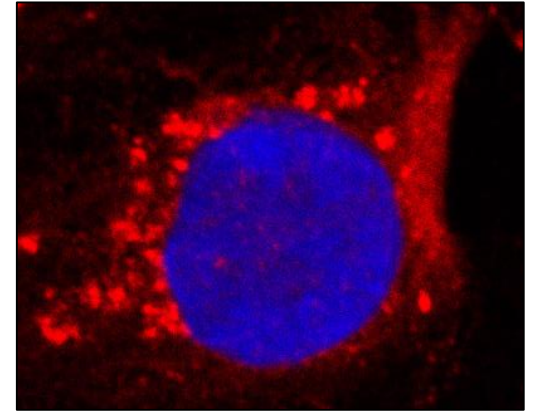

A)

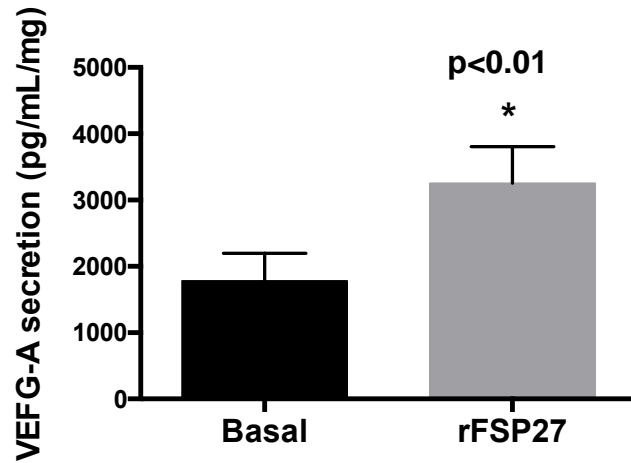

B)

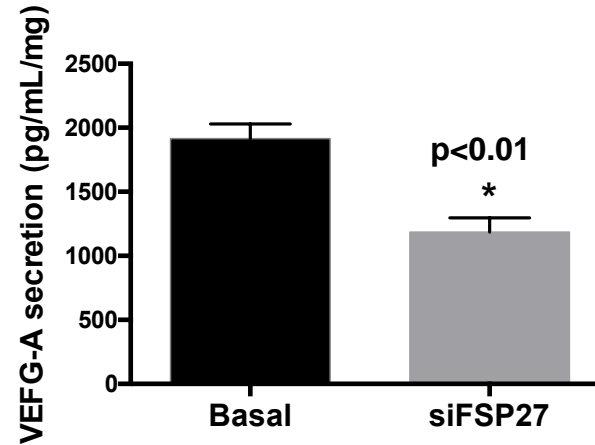

**Figure S3. Secretion of VEGF-A from human visceral and subcutaneous fat in response to recombinant human FSP27 and FSP27 siRNA.**

**A)** Exposure of visceral fat to rFSP27 increased VEGF-A secretion (n=11, p<0.01). **B)** Conversely, siRNA FSP27 knockdown significantly decreased VEGF-A secretion from SC fat. (n=10, p<0.01). Data are expressed as picogram (pg) of VEGF-A in mL of media per mg of total protein in tissue.

**Figure S4. Protein levels of VEGF-A and FSP27 in human aortic endothelial cells (HAEC) and human peripheral blood macrophages (MACS).**

Western blot showing prominent protein expression of FSP27 and VEGF-A in commercially available human aortic endothelial cells (HAEC) while FSP27 expression was essentially absent in MACS.

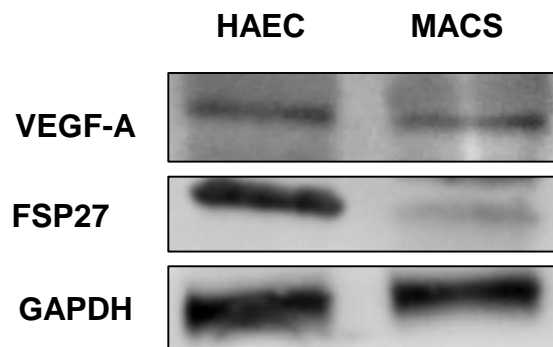

**Figure S5. 3-D Immunohistochemistry of fibroblasts demonstrating intracellular/cytosol localization of rFSP27.**  
Green = rFSP27, blue = nucleus.

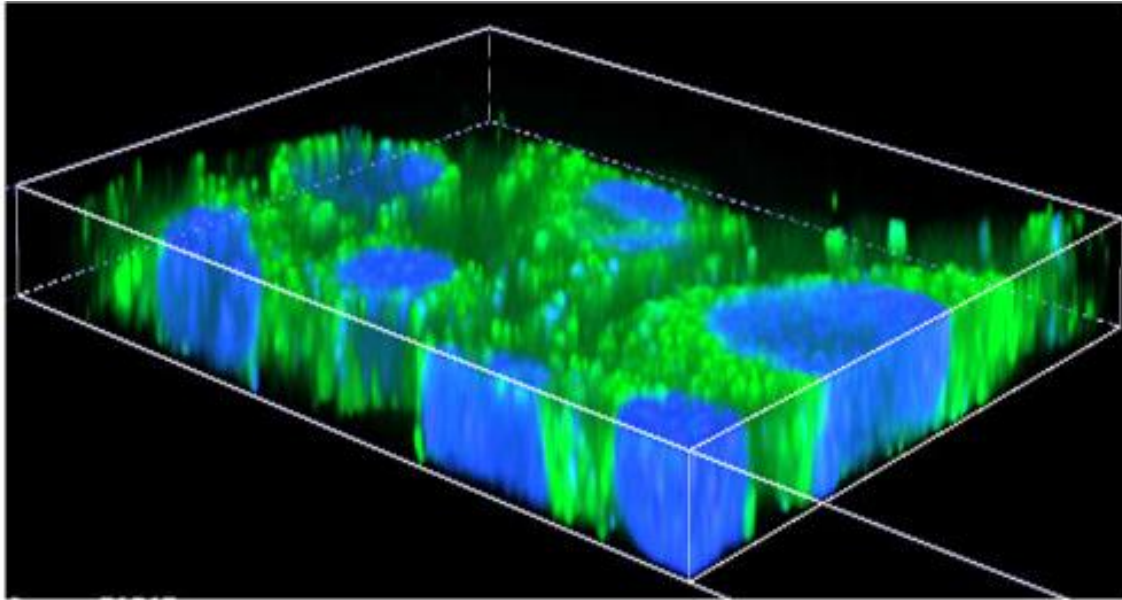

Supplement: JAH3-8-e011431-s001.pdf [file JAH3-8-e011431-s001.pdf]
